# Supplementary material
Source: Springer Nature journal article supplement (https://www.springermedizin.de/resource/supplementary/12990_2013_720_MOESM3_ESM.pdf/9612244)

**A**  $Na_v$ s expression in L4/L5 DRGs after SNI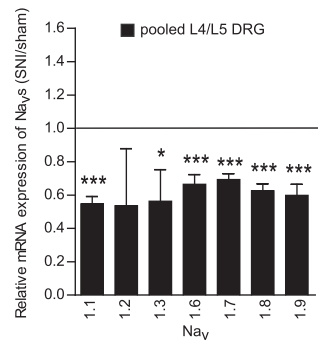**B**  $Na_v$ s expression in L4 or L5 DRGs after SNL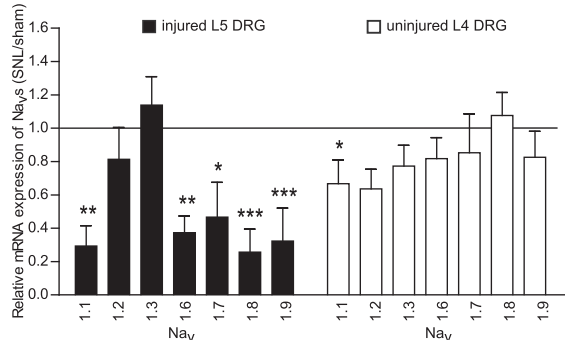**C**  $Na_v$ s expression in L3, L4 or L5 DRGs after SNI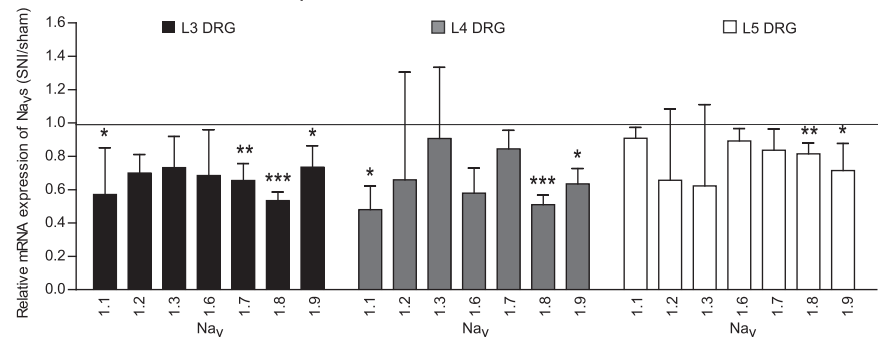

Supplement: MOESM3 [file 9612244]
